## AIR SAC GASES AND VENTILATION DURING PANTING IN FOWL, *GALLUS GALLUS*.

By J. H. BRACKENBURY, P. AVERY AND M. GLEESON

Department of Biology, University of Salford, Salford M5 4WT

(Received 7 July 1980)

Exposure to elevated environmental temperatures produces large increases in ventilation and respiratory evaporation in birds (Calder & Schmidt-Nielsen, 1967; Bouverot, Hildwein & LeGoff, 1974; Richards, 1976). Some workers have reported severe blood alkalosis in panting birds due to lung hyperventilation (Linsley & Burger, 1964; Calder & Schmidt-Nielsen, 1968; Frankel & Frascella, 1968), others only a small decrease in arterial  $P_{CO_2}$  (Marder, Arad & Gafni, 1974; Marder & Arad, 1975; Krausz, Bernstein & Marder, 1977). It has often been suggested, following Zeuthen (1942), that intrapulmonary valves may shunt air away from the parabronchi during panting thus alleviating the risk of hypocapnic alkalosis but such valves have not yet been demonstrated *in vivo*.

Recently Bech, Johansen & Maloiy (1979) showed that flamingoes, *Phoenicopterus ruber*, avoid hypocapnia during panting by restricting hyperventilation to the respiratory dead space. This is achieved by a 7-fold reduction of tidal volume,  $V_T$  to a value which closely matches the tracheal dead space,  $V_D$ . As a result of the diminished  $V_T$ , carbon dioxide accumulated within the respiratory system and rapid, shallow panting was periodically interrupted by bursts of 1-3 deeper breaths which served to flush out the excess carbon dioxide.

We have observed a similar pattern of respiration in domestic fowl *Gallus gallus* exposed for 1 h periods to environmental temperatures  $T_a$  of 35-40 °C. After 15-30 min of panting the mean  $P_{CO_2}$  of the interclavicular air sac fell by 3.5 torr whilst that of the abdominal air sac rose by 10.4 torr (Fig. 1). During each burst of deep respiration the gas composition of the abdominal sac transiently returned towards its resting, non-panting value and the measured rates of oxygen consumption  $\dot{V}_{O_2}$  and carbon dioxide production  $\dot{V}_{CO_2}$  transiently increased; at the same time end-tidal  $P_{O_2}$  fell markedly (Fig. 1, inset). These observations show that during shallow panting stale air accumulates within the caudal air sacs. This gas is used to ventilate the palaeopulmo during expiration but it is clear from the slight freshening of interclavicular sac gas, which is similar in composition to end-parabronchial gas, that gas exchange in the parabronchi is not impeded. This is also borne out by the slight fall in arterial  $P_{CO_2}$  (Table 1).

Recordings such as that in Fig 1, inset, do not give an accurate reflection of the composition of gas leaving the lung during shallow panting since the  $V_T$  is probably only slightly larger than the tracheal volume and the stale gas front fails to register

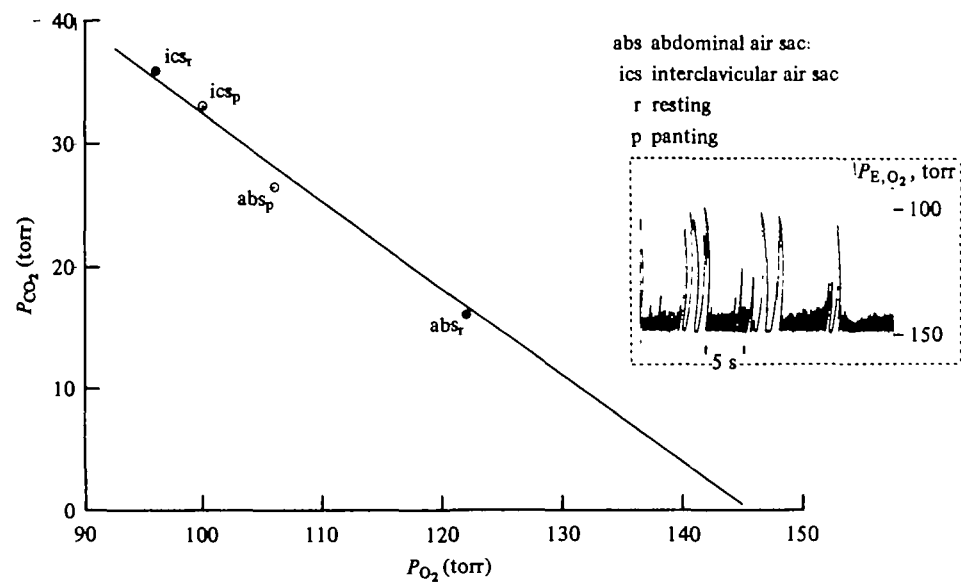

Fig. 1.  $P_{CO_2}$ - $P_{O_2}$  diagram based on mean values for interclavicular and abdominal air sac gas composition during rest and panting. Inset shows recording of expired oxygen during panting. Air-sac gases were recorded continuously from permanently implanted cannulae. For the recording of expired oxygen the birds wore a tight-fitting mask connected to the atmosphere via a low-resistance breathing tube from which the gas sample was drawn.

Table 1. *Respiratory characteristics in awake chickens at rest and during panting*

(Data based on 12 animals. S.E. in parentheses.  $P_a$ ,  $CO_2$  and  $pH_a$  measured in carotid artery.  $\dot{V}_{O_2}$  measured by technique of Brackenbury & Avery (1980).  $\dot{V}_D$ , From Kuhlmann & Fedde (1976).  $\dot{V}$ ,  $\dot{V}_I$  and  $\dot{V}_D$  calculated according to method described in text).

|                                                              | Rest            | Panting         | Rest/panting |
|--------------------------------------------------------------|-----------------|-----------------|--------------|
| $W$ (kg)                                                     | 2.2             | —               | —            |
| $T_a$ (°C)                                                   | 18-22           | 35-40           | —            |
| $T_b$ (°C)                                                   | 41.51 (± 0.05)  | 42.83 (± 0.174) | —            |
| $P_a$ , $CO_2$ , torr                                        | 26.2 (± 0.23)   | 24.8 (± 0.7)    | —            |
| $pH_a$                                                       | 7.506 (± 0.006) | 7.551 (± 0.012) | —            |
| $\frac{\dot{V}_{O_2}}{W}$ ( $\frac{ml\ STPD}{kg\cdot min}$ ) | 14.6 (± 0.76)   | 13.8 (± 0.87)   | —            |
| $f$ ( $min^{-1}$ )                                           | 15.4 (± 0.4)    | 174 (± 7.9)     | 11.3         |
| $\dot{V}_D$ (ml BTPS)                                        | 8               | 8               | —            |
| $\dot{V}$ ( $\frac{ml\ BTPS}{kg\cdot min}$ )                 | 360             | 952             | 2.6          |
| $\dot{V}_I$ ( $\frac{ml\ BTPS}{kg\cdot min}$ )               | 304             | 319             | 1.05         |
| $\dot{V}_D$ ( $\frac{ml\ BTPS}{kg\cdot min}$ )               | 56              | 633             | 11.3         |
| $\dot{V}_T$ (ml BTPS)                                        | 51.4            | 12.0            | 0.23         |

ally on the gas analyser. However, the  $P_{O_2}$  of end-expired gas during normal breathing and during sustained exercise is approximately 8 torr greater than that of interclavicular sac gas (J. Brackenbury, P. Avery & M. Gleeson, in preparation). Using interclavicular sac  $P_{O_2}$  as a gauge of end-expired gas it is possible to calculate the effective lung ventilation  $\dot{V}_l$  from the measured  $\dot{V}_{O_2}$  as follows:  $\dot{V}_l = 876 \dot{V}_{O_2} / (P_{IO_2} - P_{iO_2} - 8)$  ml BTPS  $\text{min}^{-1}$  where the figure 876 incorporates the factor for conversion from STPD to BTPS conditions. Dead space ventilation  $\dot{V}_D$  was calculated from the measured respiratory frequency  $f$  multiplied by the dead space volume  $V_D$ .

Table 1 shows that despite a 2.6-fold increase in total ventilation  $\dot{V}$ ,  $\dot{V}_l$  increased by only 5% as a result of a 4-fold drop in  $V_T$ . The rise in the  $\dot{V}_D/\dot{V}_T$  ratio during panting automatically accounts for the observed increase in  $P_{CO_2}$  of the abdominal air sacs since, as Piiper (1978) has explained, the major source of  $CO_2$  in the caudal air sacs is dead space gas re-inhaled from the trachea and primary bronchus at the beginning of each inspiration.

This work was supported by the Science and Agricultural Research Councils.

#### REFERENCES

- BECH, C., JOHANSEN, K. & MALOIJ, E. M. (1979). Ventilation and expired gas composition in the flamingo, *Phoenicopterus ruber*, during normal respiration and panting. *Physiol. Zool.* **52**, 313-328.
- BOUVEROT, P., HILDWEIN, G. & LEGOFF, D. (1974). Evaporative water loss, respiratory pattern, gas exchange and acid-base balance during thermal panting in Peking ducks exposed to moderate heat. *Respir. Physiol.* **21**, 255-269.
- BRACKENBURY, J. H. & AVERY, P. (1980). Energy consumption and ventilatory mechanisms in the exercising fowl. *Comp. Biochem. Physiol.* **66 A**, 439-445.
- CALDER, W. A. & SCHMIDT-NIELSEN, K. (1967). Temperature regulation and evaporation in the pigeon and the roadrunner. *Am. J. Physiol.* **213**, 883-889.
- CALDER, W. A. & SCHMIDT-NIELSEN, K. (1968). Panting and blood carbon dioxide in birds. *Am. J. Physiol.* **215**, 477-482.
- FRANKEL, H. M. & FRASCELLA, O. (1968). Blood respiratory gases, lactate and pyruvate during thermal stress in the chicken. *Proc. Soc. exp. Biol. Med.* **127**, 997-999.
- KRAUSZ, S., BERNSTEIN, R. & MARDER, J. (1977). The acid base balance of the rock partridge (*Alectoris chukar*) exposed to high ambient temperatures. *Comp. Biochem. Physiol.* **57 A**, 245-247.
- KUHLMANN, W. D. & FEDDE, M. R. (1976). Upper respiratory dead space in the chicken: its fraction of the tidal volume. *Comp. Biochem. Physiol.* **54 A**, 409-411.
- LINSLEY, J. G. & BURGER, R. E. (1964). Respiratory and cardiovascular responses in the hyperthermic cock. *Poultry Sci.* **43**, 291-305.
- MARDER, J., ARAD, Z. & GAFNI, M. (1974). The effect of high ambient temperatures on acid base balance of panting bedouin fowl (*Gallus domesticus*). *Physiol. Zool.* **47**, 180-189.
- MARDER, J. & ARAD, Z. (1975). The acid base balance of Abdim's stork (*Sphenorhynchus abdimii*) during thermal panting. *Comp. Biochem. Physiol.* **51 A**, 887-889.
- PIIPER, J. (1978). Origin of carbon dioxide in caudal air sacs of birds. In *Respiratory Function in Birds, Adult and Embryonic*, Berlin, Heidelberg, New York: Springer.
- RICHARDS, S. A. (1976). Evaporative water loss in domestic fowl and its partition in relation to ambient temperature. *J. agric. Sci., Camb.* **87**, 527-532.
- ZEUTHEN, E. (1942). The ventilation of the respiratory tract in birds. *Kongelige Danske Videnskabernes Selskab. Biol. Meddelelser* **17**, 1-50.
